# Supplementary material for: Magnetic graphene solid-phase extraction in the determination of polycyclic aromatic hydrocarbons in water
Source: Royal Society of Chemistry journal article supplement (doi:10.1039/c7ra10551g), 2017-01-01

## Electronic supplementary information

### Magnetic graphene solid-phase extraction in the determination of polycyclic aromatic hydrocarbons in water †

Liling Pang,<sup>a</sup> Wanfeng Zhang,<sup>b</sup> Weiya Zhang,<sup>c</sup> Pin Chen,<sup>a</sup> Jing Yu,<sup>a</sup> Gang-Tian Zhu<sup>a</sup> and Shukui Zhu<sup>\*a</sup>

<sup>a</sup> State Key Laboratory of Biogeology and Environmental Geology, China University of Geosciences, Wuhan, 430074, PR China

<sup>b</sup> State Key Laboratory of Isotope Geochemistry, Guangzhou Institute of Geochemistry, Chinese Academy of Sciences, P.O. Box 1131, Wushan, Guangzhou 510640, PR China

<sup>c</sup> Testing & Technology Centre for Industrial Products, Shenzhen Entry-exit Inspection and Quarantine Bureau, 518067, PR China

† Electronic Supplementary Information (ESI) available. See DOI: 10.1039/x0xx00000x

#### 1. Optimization of the extraction parameters

The detailed extraction conditions used in the experiments of optimization of the extraction parameters were as follows.

1.1 Effect of the amount of the sorbents on the chromatography peak areas of the PAHs. Extraction conditions: sample volume, 100mL; extraction time, 5min; organic modifier, 3% 2-propanol; desorption solvent, 100μL of composite solvent (toluene: acetone (v:v) 3:1); desorption time, 5min; concentration of the analytes, 5μg/L.

1.2 Effect of the extraction time on the chromatography peak areas of the PAHs. Extraction conditions: sample volume, 100mL; amount of the sorbents, 10mg; organic modifier, 3% 2-propanol; desorption solvent, 100μL of composite solvent (toluene: acetone (v:v) 3:1); desorption time, 5min; concentration of the analytes, 5μg/L.

1.3 Effect of the selection of desorption solvent on the chromatography peak areas of the PAHs. Extraction conditions: sample volume, 100mL; amount of the sorbents, 10mg; extraction time, 5min; organic modifier, 3% 2-propanol; volume of desorption solvent, 100μL, desorption time, 5min; concentration of the analytes, 5μg/L.

1.4 Effect of the amount of desorption solvent on the chromatography peak areas of the PAHs. Extraction conditions: sample volume, 100mL; amount of the sorbents, 10mg; extraction time, 5min; organic modifier, 3% 2-propanol; desorption solvent, composite solvent (toluene: acetone (v:v) 3:1); desorption time, 5min; concentration of the analytes, 5μg/L.

1.5 Effect of the desorption time on the chromatography peak areas of the PAHs. Extraction conditions: sample volume, 100mL; amount of the sorbents, 10mg; extraction time, 5min; organic modifier, 3% 2-propanol; desorption solvent, 100μL composite solvent (toluene: acetone (v:v) 3:1); concentration of the analytes, 5μg/L.

**2. Figure scheme 1:** The SEM image in Figure scheme 1 is same as Fig. 1e, where the image is clearer and the size is larger. In order to avoid needless duplication, we deleted the SEM image in Figure scheme 1. Finally, the figure scheme 1 is as follows.

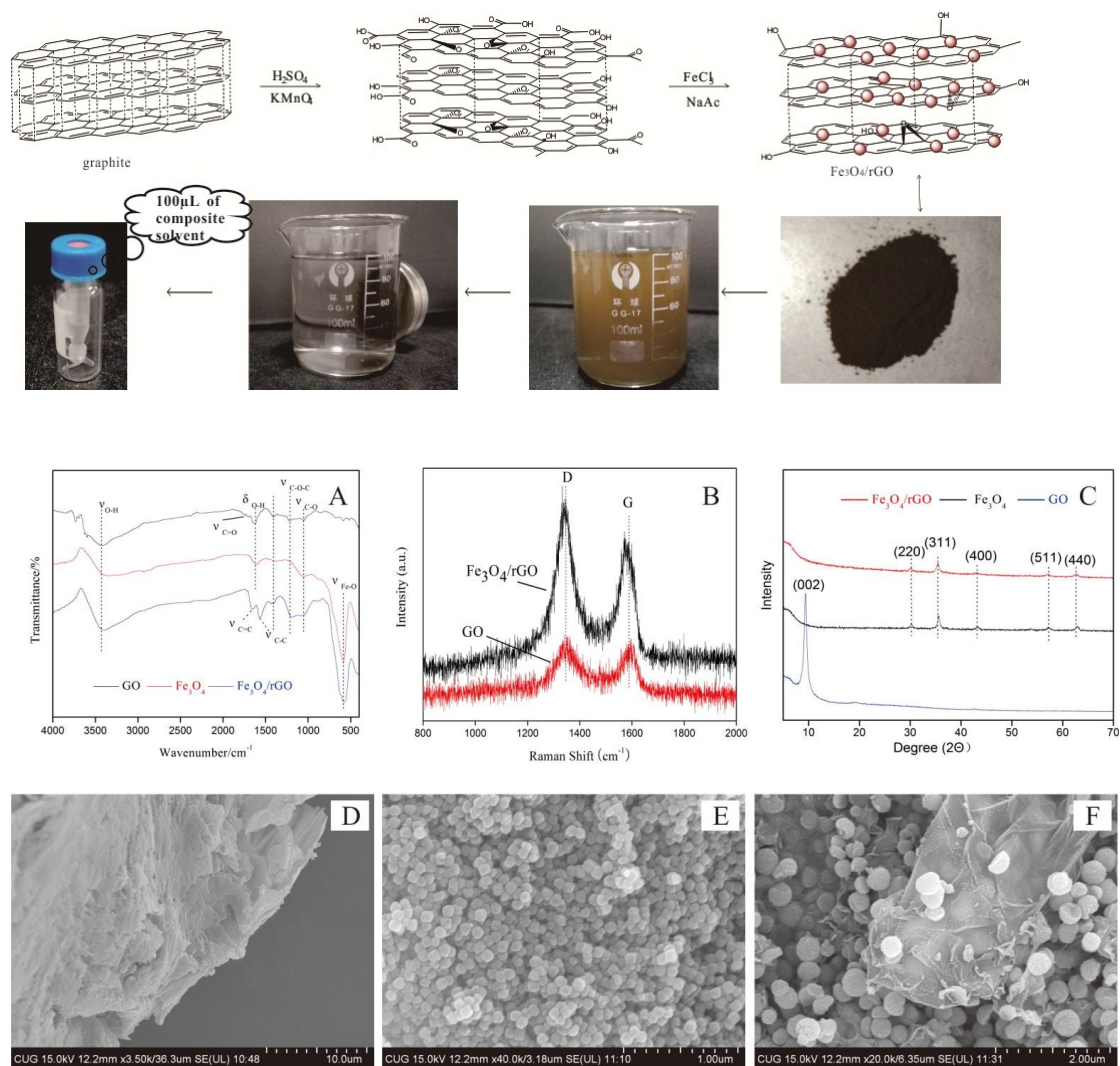

**Fig. 1** (A) FTIR spectra of GO,  $\text{Fe}_3\text{O}_4$  and  $\text{Fe}_3\text{O}_4/\text{rGO}$ ; (B) Raman spectra of  $\text{Fe}_3\text{O}_4/\text{rGO}$  and GO; (C) X-ray diffraction patterns of GO,  $\text{Fe}_3\text{O}_4$  and  $\text{Fe}_3\text{O}_4/\text{rGO}$ ; SEM images of (D) GO, (E)  $\text{Fe}_3\text{O}_4$  and (F)  $\text{Fe}_3\text{O}_4/\text{rGO}$ .

### 3. Fig. S1: Total adsorption of 10mg of $\text{Fe}_3\text{O}_4/\text{rGO}$ for 100mL water containing 20mg/L PAHs

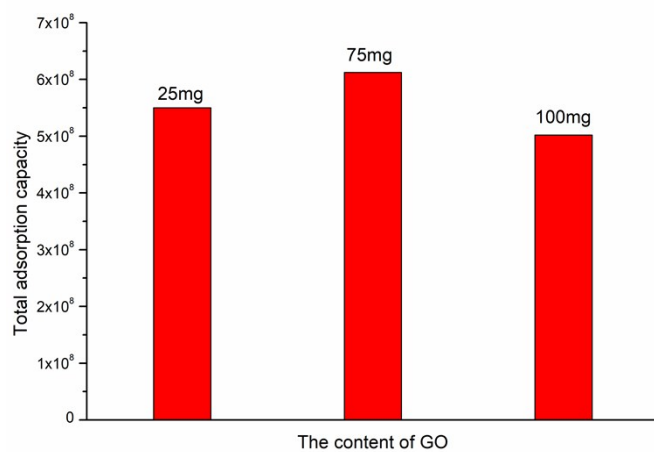

Supplement: c7ra10551g1.pdf [file c7ra10551g1.pdf]
